# Supplementary material
Source: PubMed Central journal article supplement (PMC2995806)
Supplement: NIHMS219153-supplement-SupData.pdf [file NIHMS219153-supplement-SupData.pdf]

## Supplementary Material

### Prediction of several novel families of enzymes involved in oxidative and other complex modifications of bases in nucleic acids

Lakshminarayan M Iyer<sup>1</sup>, Mamta Tahiliani<sup>2</sup>, Anjana Rao<sup>2</sup> and [L. Aravind<sup>1\\*</sup>](mailto:aravind@mail.nih.gov)

\* Address for correspondence: L. Aravind ([aravind@mail.nih.gov](mailto:aravind@mail.nih.gov))

<sup>1</sup>National Center for Biotechnology Information, National Library of Medicine, National Institutes of Health, Bethesda, MD 20894, USA  
<sup>2</sup>Department of Pathology, Harvard Medical School and Immune Disease Institute, 200 Longwood Avenue, Boston, Massachusetts 02115, USA.

#### Abstract

Modified bases in nucleic acids present a layer of information that directs biological function over and beyond the coding capacity of the conventional bases. While a large number of modified bases have been identified, many of the enzymes generating them still remain to be discovered. Recently, members of the 2-oxoglutarate- and iron(II)-dependent dioxygenase superfamily, which modify diverse substrates from small molecules to biopolymers, were predicted and subsequently confirmed to catalyze oxidative modification of bases in nucleic acids. Of these, two distinct families, namely the AlkB and the kinetoplastid base J binding proteins (JBP) catalyze in situ hydroxylation of bases in nucleic acids. Using sensitive computational analysis of sequences, structures and contextual information from genomic structure and protein domain architectures, we report five distinct families of 2-oxoglutarate- and iron(II)-dependent dioxygenase that we predict to be involved in nucleic acid modifications. Among the DNA-modifying families, we show that the dioxygenase domains of the kinetoplastid base J-binding proteins belong to a larger family that includes the Tet proteins, prototyped by the human oncogene Tet1, and proteins from basidiomycete fungi, chlorophyte algae, heterolobosean amoebae and bacteriophages. We present evidence that some of these proteins are likely to be involved in oxidative modification of the 5-methyl group of cytosine leading to the formation of 5-hydroxymethylcytosine. The Tet/JBP homologs from basidiomycete fungi such as *Laccaria* and *Coprinopsis* show large lineage-specific expansions and a tight linkage with genes encoding a novel and distinct family of predicted transposases, and a member of the Maelstrom-like HMG family. We propose that these fungal members are part of a mobile transposon. To the best of our knowledge, this is the first report of a eukaryotic transposable element that encodes its own DNA-modification enzyme with a potential regulatory role. Through a wider analysis of other poorly characterized DNA-modifying enzymes we also show that the phage Mu Mom-like proteins, which catalyze the N6-carbamoylmethylation of adenines, are also linked to diverse families of bacterial transposases, suggesting that DNA modification by transposable elements might have a more general presence than previously appreciated. Among the other families of 2-oxoglutarate- and iron(II)-dependent dioxygenases identified in this study, one which is found in algae, is predicted to mainly comprise of RNA-modifying enzymes and shows a striking diversity in protein domain architectures suggesting the presence of RNA modifications with possibly unique adaptive roles. The results presented here are likely to provide the means for future investigation of unexpected epigenetic modifications, such as hydroxymethyl cytosine, that could profoundly impact our understanding of gene regulation and processes such as DNA demethylation.

#### Contents

1. Multiple sequence alignment of novel members of the 2OGFeDO superfamily.
2. Phyletic distribution of the TET1/JBP family of proteins
- 2b. Superalignment of metazoan TET domains with intron-exon boundaries
- 2c. Multiple sequence alignment of the TET1, TET2 and TET3 proteins
- 2d. Multiple sequence alignment of the JBP1-C terminal domain
- 2e. Multiple sequence alignment of novel transposase and identical hits
- 2f. Multiple sequence alignment of the HMG domain found in the vicinity of the 2OGFeDO containing transposon
- 2g. Multiple sequence alignment of small alpha helical domain found either in the neighborhood or fused to JBP and/or the transposase
- 2h. Multiple sequence alignment of Cys cluster that is often fused to the hydroxylase domain
- 2i. Gene neighborhoods of the predicted transposase gene associated with JBP
3. Phyletic distribution, domain architectures and alignment of the algal RNA-modification associated family
4. Phyletic distribution, domain architecture and multiple sequence alignment of the fungal subfamily of AlkB proteins that are fused to SAD and R3H domains
- 5a. Phyletic distribution and multiple sequence alignment of the R3H domain-associated family of 2OGFeDO proteins
- 5b. Multiple sequence alignment of domain C-terminal to the 2OGFeDO domain, called X in Figure 2
- 5c. Multiple sequence alignment of the R3H domain fused to the 2OGFeDO domain
- 6a. Phyletic distribution and multiple sequence alignment of the DNA glycosylase associated family of 2OGFeDO domains
- 6b. Gene neighborhoods of the bacterial versions of the DNA glycosylase associated family
7. Phyletic distribution, domain architectures and multiple sequence alignment of the MOM-family of acetyltransferases
8. Table of distribution of Methylases and predicted DNA-modifying hydroxylases

#### 1a. Multiple sequence alignment of novel members of the 2OGFeDO superfamily.

```

Secondary Structure      -EEEE-----saprfrfridpsplhekn-----hhhhhhh--hhhhhhh--HHHHHHHHHHHH-----EEEEEE-----
TET1_Human              SWSMYFNgcKkfr-----saprfrfridpsplhekn-----LEDNQSLATPLAPYKQYAPYAYQNOVEYENVArecl-----gs-KEGRPFSGVATC-----
TET1_Mouse              SWSMYFNgcKkfr-----semprkfrl apyvlhekg-----LEKKGELATVLAFLFKQAFYAYQNOVEYEVAgdcrl-----eg-EGRPFSGVTC-----
TET3_Human              SWSMYFNgcKkyar-----sktrpkfrlsgdnkpeeev-----LRKSFODLATEVAPLYKRLAPQAYQNOVNERIAIdcrl-----gl-KEGRFPAGVATC-----
TET3_Mouse              SWSMYFNgcKkyar-----sktrpkfrlsgdnkpeeev-----LRNSFODLATEVAPLYKRLAPQAYQNOVNEVDAIdcrl-----gl-KEGRPFSGVATC-----
TET2_Human              SWSMYFNgcKkfar-----sklprkfrl lgdgpkceek-----LESHLQNLSTLMAPTYKRLAPADAYNNQIYEHRRApecl-----gd-KEGRPFSGVATC-----
TET2_Mouse              SWSMYFNgcKkfar-----skkprkfrl hgaepkeeev-----LGSHLQNLATVIAPYKRLAPADAYNNQVFEHQApdccl-----gl-KEGRPFSGVATC-----
LOC580376_Sea urchin    SWSMYFNgcKkfar-----sktrpkfrl lsgnqgedv-----LSDRFQMATDLGPLYKRLAPEFNPNVFEESKcecl-----gk-ETGRFAQVATC-----
CG2083_Drosophila       SWSMYFNgcKkyar-----sktrpkfrlsvk-----IEDHNNIATLLAFVQVCPRSYDNQTYEHEAAdcrl-----gd-EPKPFSGVATC-----
v1g22996_Nematostella  SWSMYFNgcKkfar-----skaprkyl l-dsakeet-----LERILEGIATPIAPVYSKAAPAFANOTREERNGhecrl-----ghsAVGRPFSGVTC-----
gp2_BPCooper_109392355  RNFPGYAPRprlsv-----reacstlgrdydpq-----IYOVLESYADQFAAGLAI DPELVKRGSDQ-ASvlhdw-----rl-1-GEAKLWTSGVNV-----
FRAL2749_FaIn_111222169 RNFPGYAPRprpvc-----zegcqlglaesepg-----EHRVLERWALLERTLDIDPSIVARDAQYMTYV-dsaw-----rl-OGGRLWTSGVNI-----
GOS_4878734_Mmet_139542046 SIFQSLPrntmr-----dferfsahkksik-----YNNIFSPMNDL INIKYKLPQYERDRIVKESVwedv-----al-NKKSPLFCMNI-----
GOS_153646_Mmet_134535573 CIIGSYDrntmr-----imhnsrsvhrskaagt-----PIKAMVLAGRQSLSVIKRLPELPEYTHRESVLDrvpeqg-----rf-RCDLFTSTVNI-----
GOS_9579659_Mmet_135108850 -----vlatraqpe-----VFAGLSKVKGLMVGQVCPPEVAANQKQFVGGIhdh-----wk-KTGFPTFTVNV-----
GOS_3272744_Mmet_139110457 -----mlmccleSENLIKYMPEQYASOKKLIETtlp-----mlmccleSENLIKYMPEQYASOKKLIETtlp-----ky-RFQNLFTSSISN-----
GOS_4428895_Mmet_140212139 -----KRAMLMSCLESEKIRIKYQMPQYASOKKLIETtlp-----KRAMLMSCLESEKIRIKYQMPQYASOKKLIETtlp-----ey-RFQNLFTSSISN-----
JBP1_Tbru_6018043       GIAGYDrqtpv-----elkorktsfctyhtk-----KPAVPLPVYVSEIYVPEVPHRAADSAPDI-----LEETtlp-----ky-RFQNLFTSSISN-----
JBP2_Tbru_72391588      GIAGYDrqtpv-----elkorktsfctyhtk-----KIPORTKTKFKEVH-----KWDCIPFIEIDKQFSIHIPDRHKVOLERASLT-kd-----fq-1KNTAFTITIN-----
Tc00_1047053506605_229_Tcru_71662347 GILGYDylmnp-----krkermtfetrnwgk-----IIGCGELLQLLDQLYKENADPHYLQRRVLPPE-----ym-LFMTVFTVTVN-----
Tc00_1047053519357_10_Tcru_71421637  GIVGYDylmnp-----qkrceretftrknwss-----VDSVDSFVLMVKLIDSLFKCLIPDAYKROLNRANLR-dk-----fk-1PMTSFTVTVN-----
GOS_4675571_Mmet_139186735 GIAGYDrqtpv-----elkorktsfctyhtk-----SWNFPMHIDVSAIYKAVFPEQAAQDAVPDI-----vT-1HGSFSTLTVN-----
GOS_4428895_Mmet_140212139 GIAGYDrqtpv-----elkorktsfctyhtk-----SWNFPMHIDVSAIYKAVFPEQAAQDAVPDI-----vT-1HGSFSTLTVN-----
GOS_9294781_Mmet_135380621 GIIYFDrydrnlqngktp-----kiportktkfkevh-----KIIPORTKTKFKEVH-----KWDCIPFIEIDKQFSIHIPDRHKVOLERASLT-kd-----fq-1KNTAFTITIN-----
GOS_3208587_Mmet_139987906 SIIGYDrprip-----yrcrtafctkhd-----MYSQIPIYQSIKLFEEFLPERWQNKQNEWKTsed-----fk-1HGTFTVTVN-----
GOS_7711251_Mmet_136831790 NIPGFYEssnfs-----klperlthfrtnfd-----KYNVGLPFFQKIDSLFKCLIPDAYKROLNRANLR-dk-----fk-1PMTSFTVTVN-----
GOS_9234699_Mmet_135432669 NIPGFYEssnfs-----klperlthfrtnfd-----DYNKGLFQIQIDSLFKCLIPDAYKROLNRANLR-ph-----lk-1PMTSFTVTVN-----
GOS_464085_Mmet_144014002 NIMGYDrwdsirasKragmkp-ptrcrltsfctsrpe-----KWENVPLIQIDIAQYKRLVPKAYANORQAADS-vk-----fk-1PMTSFTVTVN-----
GOS_8006756_Mmet_136547457 NIIGYMDwtlghkymfsgvmkeikpavrsyftqnyd-----NWTPKSLVKHIDIAQYKRLAPVYKQKQAKADET-y-----fk-1KGTATTLTIN-----
GOS_8124242_Mmet_136439712 NIIGYDkrdnl-----gan-pporttaftsgvq-----KWNVVPLKIMIDIQKRLIPSNHRIQYDRANKT-d-----fv-1NGTAFSTVTVN-----
GOS_398524_Mmet_144068378 GVALRQgkalelcnlpgdgrpa-tpcifigdsamyik-----FLEWQPLFAVLGGIATVTHWPLDAGLSILSSLE-hgkldisgpenll-----dvlb-FWSNPFSTKFLI-----
GOS_137212_Mmet_134552279 GVVGFMDKsami-----yrcrtafctkhd-----NYOQGLPFFVQVDEYKLCPEYINRQKNIAGETnqg-----fv-1DPTSTFTVTVN-----
CCIG_03999_Ccin_169848807 GVACFAPawavagheksllpg-----pstplkksyik-----FVDEMEESLALVGLVSHVPELEI GCVHNMNrvadesqvkypqevh-----rvlk-TWASFTLGLSLI-----
LACBTRDAPF_136849_Lbic_170117859 GIVNLSFawfsgqghepedl-----zasidqepant-----YLQNLVLANAVGLIYAVIQDLPESGLATEKLANha-----iall-VWATFTLGLSLI-----
CCIG_09735_Ccin_169868221 GVATFSSCyyqghdgdpsps-----psaslkpppqa-----FRDMTEESAVLGGVIAITQWPLFNAGLEVLVLESLh-rtfipvdnaetld-----alln-FWSNPFSTKFLI-----
CCIG_09735_Ccin_169868221 GVALRQgkalelcnlpgdgrpa-tpcifigdsamyik-----FLEWQPLFAVLGGIATVTHWPLDAGLSILSSLE-hgkldisgpenll-----dvlb-FWSNPFSTKFLI-----
CHLREDRAPF_179132_Crei_159485382 QOAVRQppwqlkprtr-----yvnglylceeahypfg-----IEALEEMCTAVVAEAVOIAFYLYTRDFELSAWgq-----am-YGTATNLVSMI-----
CHLREDRAPF_193135_Crei_159480130 GNALIQNdqkalsk-----yavaharvrtsvnyqka-----NVDMEPEESLALVGLVSHVPELEI RFLMAYRDLVITQgk-----fm-1GATATNLVSLP-----
CHLREDRAPF_180688_Crei_159491750 ARPRVSCkydqdk-----yaaataedaate-----PERLITMTCRVTWGAVEVFFLEECRDVFLSPVgk-----vc-YDGTMTMOSVTV-----

```

Ngru1000008499 Ngru Ngru1000008499  
 Ngru1000004275 Ngru Ngru1000004275  
 Ngru100014031 Ngru Ngru100014031  
 Ngru1000012731 Ngru Ngru1000012731  
 Ngru100009725 Ngru Ngru100009725  
 Ngru100002001 Ngru Ngru100002001  
 Ngru1000012827 Ngru Ngru1000012827  
 Ngru100013068 Ngru Ngru100013068  
 Aano1000002837 Aano Aano1000002837  
 Aano1000006794 Aano Aano1000006794  
 Aano1000008654 Aano Aano1000008654  
 Aano100001260 Aano Aano100001260  
 Aano1000010511 Aano Aano1000010511  
 Aano1000003820 Aano Aano1000003820  
 Aano1000005385 Aano Aano1000005385  
 Mpus1000003041 Mpus Mpus1000003041  
 Mpus1000008227 Mpus Mpus1000008227  
 Aano1000005614 Aano Aano1000005614  
 PHATRDRAFT\_50200 Ptri\_219129852  
 PHATRDRAFT\_42626 Ptri\_217411154  
 PHATR 44207 Ptri\_219113839  
 Oe10g03170 Otau\_116002016  
 OSTLU\_93380 Olic\_145351887  
 THAPSDRAFT\_21769 Tpsa\_220975450  
 Aano1000005432 Aano Aano1000005432  
 ALKB Ec\_113638  
 ALKBH3 Hsap\_21040275  
 Aano1000003820 Aano Aano1000003820  
 CIMG\_06114 Cimm\_119182137  
 ATEG\_08110 Ater\_115433188  
 An09g03880 Anig\_145242116  
 AN3951\_2 Anig\_167625987  
 BC1G\_08942 Bfuc\_154305295  
 CHGG\_06386 Cglo\_116193337  
 LACB1DRRAFT\_131729 Lbic\_170093061  
 CNBL2390 Cneo\_134117982  
 SMOG\_03244 Fmo\_169600101  
 Franean1\_7129 Fsp\_158318848  
 GobsU\_010100005758 Gobs\_168699004  
 BlinB01002514 Blin\_62423906  
 AvindRAFT\_5847 Avin\_67153576  
 Acry\_3179 Acry\_14824370010095614  
 An18g01550 Anig\_145254402  
 CCG\_09674 Ccin\_169866364  
 CCG\_09656 Ccin\_169866328  
 CCG\_09671 Ccin\_116499174  
 CHL1DRRAFT\_153459 Crei\_159485224  
 Dpui1000012176 Dpui\_1000012176  
 Dpui1000004224 Dpui\_1000004224  
 FG09449.1 Gzea\_42553402  
 LACB1DRRAFT\_32592 Lbic\_164645299  
 LACB1DRRAFT\_328485 Lbic\_170102781  
 LACB1DRRAFT\_315778 Lbic\_164646975  
 NCU09412 Ncra\_85091137  
 Ngru1000002312 Ngru Ngru1000002312  
 Ngru1000008142 Ngru Ngru1000008142  
 Ngru1000013028 Ngru Ngru1000013028  
 Pc13g0210 Pchr\_211583340  
 PHYPADRAFT\_169264 Ppat\_162672410  
 Pp1a1000002318 Pp1a\_Pp1a1000002318  
 Ppam1000011751 Ppam\_Ppam1000011751  
 Psoj1000008776 Psoj\_Psoj1000008776  
 Smeo1000018380 Smeo\_Smeo1000018380  
 Smeo1000018266 Smeo\_Smeo1000018266  
 TSTA\_016850 Tsta\_218711789  
 P4H Crei\_159794863  
 NONBRDRAFT\_31538 Mbre\_167519270  
 OSTLU\_32491 Olic\_145348837  
 OSTLU\_17228 Olic\_145351789  
 Oe10g09020 Otau\_116058658  
 OSTLU\_28402 Olic\_145346166  
 OSTLU\_28816 Olic\_145341417  
 Oe10g02080 Otau\_116000439  
 PHATRDRAFT\_47703 Ptri\_219123239  
 PHATRDRAFT\_43074 Ptri\_219110259  
 PHATRDRAFT\_37198 Ptri\_219120466  
 PHATRDRAFT\_42585 Ptri\_219109862  
 PHATRDRAFT\_49155 Ptri\_219127159  
 Aano1000005937 Aano Aano1000005937  
 STIAU\_4281 Saur\_115375244  
 MXAN\_2402 Mxan\_10109216  
 Syncc9902\_1289 Syn\_78184862  
 BL107\_13860 Syn\_116070736  
 Syncc9605\_1181 Syn\_78212712  
 consensus/80%  
 consensus/70%  
 consensus/85%  
 consensus/75%

Species abbreviations: Aano : Aureococcus anophagefferens; Acry : Acidiphilium cryptum; Anid : Aspergillus nidulans; Anig : Aspergillus niger; Ater : Aspergillus terreus; Avin : Az

[Back to Contents](#)

**2a. Phyletic distribution of the TET/JBP family of proteins**

| #: Tet/JBP family; bacteriophage gp2 subfamily                                |                        |        |                                           |                                          |                                               |  |  |
|-------------------------------------------------------------------------------|------------------------|--------|-------------------------------------------|------------------------------------------|-----------------------------------------------|--|--|
| gi                                                                            | gene_name              | length | Species                                   | class                                    | GenBank_annotation                            |  |  |
| 111222169                                                                     | FRAL2749               | 277    | Frankia alni ACN14a                       | actinobacteria                           | hypothetical protein FRAL2749 [Frankia alni   |  |  |
| 194100516                                                                     | Nigel2                 | 322    | Mycobacterium phage Nigel                 | dsDNA viruses, no RNA stage/caudovirales | gp2 [Mycobacterium phage Nigel].              |  |  |
| 19392355                                                                      | Cooperp2               | 322    | Mycobacterium phage Cooper                | dsDNA viruses, no RNA stage/caudovirales | gp2 [Mycobacterium phage Cooper].             |  |  |
| <b>Sequences from marine metagenomes that are closer to the gp2 subfamily</b> |                        |        |                                           |                                          |                                               |  |  |
| 139110457                                                                     | GOS_3272744            | 133    | marine metagenome                         |                                          | hypothetical protein GOS_3272744 [marine meta |  |  |
| 139186735                                                                     | GOS_4675711            | 137    | marine metagenome                         |                                          | hypothetical protein GOS_4675711 [marine meta |  |  |
| 139542046                                                                     | GOS_4878734            | 201    | marine metagenome                         |                                          | hypothetical protein GOS_4878734 [marine meta |  |  |
| 140212139                                                                     | GOS_4428895            | 107    | marine metagenome                         |                                          | hypothetical protein GOS_4428895 [marine meta |  |  |
| 142006841                                                                     | GOS_3046279            | 235    | marine metagenome                         |                                          | hypothetical protein GOS_3046279 [marine meta |  |  |
| 134535573                                                                     | GOS_153646             | 182    | marine metagenome                         |                                          | hypothetical protein GOS_153646 [marine metag |  |  |
| 135108850                                                                     | GOS_9579659            | 181    | marine metagenome                         |                                          | hypothetical protein GOS_9579659 [marine meta |  |  |
| <b>#:Tet/JBP family; JBP subfamily</b>                                        |                        |        |                                           |                                          |                                               |  |  |
| gi                                                                            | gene_name              | length | Species                                   | class                                    | GenBank_annotation                            |  |  |
| 6018043                                                                       | JBP1                   | 811    | Crichidia fasciculata                     | euglenozoa>kinetoplastida                | J-binding protein [Crichidia fasciculata].    |  |  |
| 6018045                                                                       | JBP1                   | 827    | Leishmania tarantolae                     | euglenozoa>kinetoplastida                | J-binding protein [Leishmania tarantolae].    |  |  |
| 146078722                                                                     | Lin309.1540            | 814    | Leishmania infantum JPCM5                 | euglenozoa>kinetoplastida                | DNA J-binding protein, putative [Leishmania i |  |  |
| 6018041                                                                       | JBP1                   | 839    | Trypanosoma brucei                        | euglenozoa>kinetoplastida                | J-binding protein [Trypanosoma brucei].       |  |  |
| 157865276                                                                     | Linj309.1480           | 814    | Leishmania major strain Friedlin          | euglenozoa>kinetoplastida                | DNA J-binding protein, putative [Leishmania m |  |  |
| 140720701                                                                     | Tb927.7.4650           | 1077   | Trypanosoma brucei TREU927                | euglenozoa>kinetoplastida                | SNF2 DNA repair protein, putative [Trypanosom |  |  |
| 12391588                                                                      | Tb927.7.4650           | 1077   | Trypanosoma brucei TREU927                | euglenozoa>kinetoplastida                | SNF2 DNA repair protein, putative [Trypanosom |  |  |
| 154334093                                                                     | LbrM14_V2.0040         | 1098   | Leishmania braziliensis MIMOM/BR/75/M2904 | euglenozoa>kinetoplastida                | J-binding protein, putative [Leishmania brazi |  |  |
| 146081173                                                                     | Lin314.0040            | 1022   | Leishmania infantum JPCM5                 | euglenozoa>kinetoplastida                | J-binding protein, putative [Leishmania infan |  |  |
| 157866423                                                                     | Lin314.0040            | 1022   | Leishmania major strain Friedlin          | euglenozoa>kinetoplastida                | J-binding protein, putative [Leishmania major |  |  |
| 239107405                                                                     | Tc00.1047053510357.10  | 832    | Trypanosoma cruzi strain CL Brener        | euglenozoa>kinetoplastida                | DnaJ chaperone protein, putative [Trypanosoma |  |  |
| 71421637                                                                      | Tc00.1047053510357.10  | 832    | Trypanosoma cruzi strain CL Brener        | euglenozoa>kinetoplastida                | DnaJ chaperone protein, putative [Trypanosoma |  |  |
| 71653481                                                                      | Tc00.1047053506753.120 | 831    | Trypanosoma cruzi strain CL Brener        | euglenozoa>kinetoplastida                | DnaJ chaperone protein, putative [Trypanosoma |  |  |
| 14272266                                                                      | Tc00.1047053508859.74  | 1086   | Trypanosoma cruzi strain CL Brener        | euglenozoa>kinetoplastida                | SNF2 DNA repair protein, putative [Trypanosom |  |  |
| 71662347                                                                      | Tc00.1047053506605.229 | 986    | Trypanosoma cruzi strain CL Brener        | euglenozoa>kinetoplastida                | SNF2 DNA repair protein, putative [Trypanosom |  |  |
| 154332081                                                                     | Tb927.7.4650           | 1077   | Leishmania braziliensis MIMOM/BR/75/M2904 | euglenozoa>kinetoplastida                | DNA J-binding protein, putative [Leishmania b |  |  |
| <b>Sequences from marine metagenomes that are closer to the JBP subfamily</b> |                        |        |                                           |                                          |                                               |  |  |
| 139897906                                                                     | GOS_3208587            | 293    | marine metagenome                         |                                          | hypothetical protein GOS_3208587 [marine meta |  |  |
| 136831790                                                                     | GOS_7711251            | 346    | marine metagenome                         |                                          | hypothetical protein GOS_7711251 [marine meta |  |  |
| 135432669                                                                     | GOS_9234698            | 420    | marine metagenome                         |                                          | hypothetical protein GOS_9234698 [marine meta |  |  |
| 144104092                                                                     | GOS_464085             | 112    | marine metagenome                         |                                          | hypothetical protein GOS_464085 [marine metag |  |  |
| 136547457                                                                     | GOS_8006756            | 320    | marine metagenome                         |                                          | hypothetical protein GOS_8006756 [marine meta |  |  |
| 136439712                                                                     | GOS_8124242            | 286    | marine metagenome                         |                                          | hypothetical protein GOS_8124242 [marine meta |  |  |
| 144068378                                                                     | GOS_398524             | 329    | marine metagenome                         |                                          | hypothetical protein GOS_398524 [marine metag |  |  |
| 134552279                                                                     | GOS_137212             | 298    | marine metagenome                         |                                          | hypothetical protein GOS_137212 [marine meta  |  |  |



Table with columns: accession, gene name, length, species, class, GenBank annotation. Lists various sequences and their corresponding annotations.

Table with columns: gi, gene name, length, species, class, GenBank annotation. Lists sequences and their annotations, including entries for Caps100002965 and others.

Table with columns: gi, domain architecture, gene name, length, species, class, GenBank annotation. Lists sequences and their domain architectures.

Fasta sequences of predicted JBP/TET family proteins in eukaryotes with incomplete genomes and not in GenBank or reconstructed fasta sequences. Includes a long block of FASTA format text.

Back to Contents

2b. Superalignment of metazoan TET domains with intron-exon boundaries.

Table showing superalignment of metazoan TET domains with intron-exon boundaries. Columns include domain names (TET1 exon bounds, etc.), coordinates, and sequence alignments.

Multiple sequence alignment of the TET1, TET2 and TET3 proteins. The alignment shows conserved regions across various species including Tetrahymena, Gallus, and Mus. Consensus sequences are provided at the bottom.

Back to Contents

2c. Multiple sequence alignment of the TET1, TET2 and TET3 proteins

TET-1 alignment. Intron-exon boundaries are indicated. The alignment shows conserved regions across various species including Tetrahymena, Gallus, and Mus. Consensus sequences are provided at the bottom.

TET-2 alignment. Intron-exon boundaries are indicated. The alignment shows conserved regions across various species including Tetrahymena, Gallus, and Mus. Consensus sequences are provided at the bottom.

TET-3 alignment. Intron-exon boundaries are indicated. The alignment shows conserved regions across various species including Tetrahymena, Gallus, and Mus. Consensus sequences are provided at the bottom.

Back to Contents

2d. Multiple sequence alignment of the JBP1-C terminal domain

Predicted secondary structure and multiple sequence alignment of the JBP1-C terminal domain across various species. Consensus sequences are provided at the bottom.

Back to Contents

2e. Multiple sequence alignment of novel transposase and identical hits

Multiple sequence alignment of novel transposase and identical hits across various species. The alignment shows conserved regions and conserved motifs across different transposase families.

LOC116278 Ggal\_118097475
MGC115244 Xlae\_148236655
hbox\_X161\_1876129
LOC568530 Drecr\_189524866
SMF\_Hsap\_160112910
LOC509419 Btau\_119895718
chr1:7159298\_Drecr\_189534053
LOC100149527 Drecr\_189535301
MRE1DRAPF\_178766\_Crei\_159484947
CHLEDRAPF\_194780\_Crei\_159488509
CHLEDRAPF\_174339\_Crei\_159473346
LACB1DRAPF\_307726\_Lbic\_170110059
LACB1DRAPF\_316727\_Lbic\_170110668
CCin\_02459\_Ccin\_169851012
CNA07690 Cneo\_58259409
BRALDRAPF\_131287\_Bf1o\_219494211
BRALDRAPF\_95999\_Bf1o\_219471002
BRALDRAPF\_91711\_Bf1o\_219462506
consensus/85%

Species abbreviations: Bf1o : Branchiostoma floridae; Btau : Bos taurus; Ccin : Coprinopsis cinerea; Clup : Canis lupus; Cneo : Cryptococcus neoformans; Crei : Chlamydomonas reinha

Identical hits in Laccaria
170103707 170103709
170094354 170120007
170114173 170114177

Back to Contents

2f. Multiple sequence alignment of the HMG domain found in the vicinity of the 20GFeD0 containing transposon

Domain boundaries
Secondary structure prediction
CCin\_02072\_Ccin\_169851139
CCin\_02773\_Ccin\_169842922
CCin\_03995\_Ccin\_169848799
CCin\_05495\_Ccin\_169864670
CCin\_05591\_Ccin\_169862973
CCin\_07037\_Ccin\_169850583
CCin\_07254\_Ccin\_169868984
CCin\_08112\_Ccin\_169860182
CCin\_09453\_Ccin\_169867988
CCin\_09747\_Ccin\_169868245
CCin\_10129\_Ccin\_169848160
CCin\_10218\_Ccin\_169857280
CCin\_10454\_Ccin\_169868188
CCin\_10664\_Ccin\_169852260
CCin\_12596\_Ccin\_169850600
CCin\_12707\_Ccin\_169864942
CCin\_12859\_Ccin\_169869222
CCin\_12891\_Ccin\_169869841
CCin\_12944\_Ccin\_169866812
CCin\_12950\_Ccin\_169862398
CCin\_13090\_Ccin\_169862006
CCin\_13128\_Ccin\_169862411
CCin\_13284\_Ccin\_169869977
LACB1DRAPF\_297419\_Lbic\_170118976
LACB1DRAPF\_315026\_Lbic\_170108467
LACB1DRAPF\_335151\_Lbic\_170117741
LACB1DRAPF\_316530\_Lbic\_170117428
LACB1DRAPF\_331947\_Lbic\_170110305
LACB1DRAPF\_332251\_Lbic\_170111125
LACB1DRAPF\_332028\_Lbic\_170103711
LACB1DRAPF\_327601\_Lbic\_170100513
LACB1DRAPF\_330019\_Lbic\_170106331
LACB1DRAPF\_330403\_Lbic\_170107125
LACB1DRAPF\_330704\_Lbic\_170111125
LACB1DRAPF\_330207\_Lbic\_170117693
LACB1DRAPF\_330006\_Lbic\_170105886
LACB1DRAPF\_329656\_Lbic\_170105236
LACB1DRAPF\_331533\_Lbic\_170117719
LACB1DRAPF\_307132\_Lbic\_170120119
LACB1DRAPF\_335987\_Lbic\_170117861
LACB1DRAPF\_335987\_Lbic\_170117861
LACB1DRAPF\_335999\_Lbic\_170116822
LACB1DRAPF\_336286\_Lbic\_170120560
2c6a Hmel2128 Hmc domains
K99 Hsap\_17942547
1111A 7 PDB
21e1a 49 database
1gt0D 50
1j4a 54
1aab 33
1e7jA 37
1j5nA 38
Species Abbreviations: Ccin : Coprinopsis cinerea; Lbic : Laccaria bicolor

Back to Contents

2g. Multiple sequence alignment of small alpha helical domain found either in the neighborhood or fused to JBP and/or the transposase

Predicted secondary structure
CCin\_09736\_Ccin\_116493919
CCin\_07252\_Ccin\_169867890
CCin\_10219\_Ccin\_116503602
CCin\_11682\_Ccin\_169864014
CCin\_12550\_Ccin\_169869581
CCin\_12678\_Ccin\_169869760
CCin\_13131\_Ccin\_169862417
CCin\_13153\_Ccin\_169863832
CCin\_12708\_Ccin\_169869474
CCin\_12861\_Ccin\_169866296
CCin\_12949\_Ccin\_169862396
CCin\_13116\_Ccin\_169869499
CCin\_05496\_Ccin\_169864672
CCin\_10425\_Ccin\_169869193
CCin\_09451\_Ccin\_169867984
CCin\_11469\_Ccin\_169859597
CCin\_11998\_Ccin\_169861169
CCin\_12695\_Ccin\_116506927
CCin\_13266\_Ccin\_169870064
LACB1DRAPF\_316487\_Lbic\_170117410
LACB1DRAPF\_333145\_Lbic\_170113173
LACB1DRAPF\_330096\_Lbic\_170117861
LACB1DRAPF\_327556\_Lbic\_170100793
LACB1DRAPF\_330405\_Lbic\_170106947
LACB1DRAPF\_306696\_Lbic\_170108481
LACB1DRAPF\_307133\_Lbic\_170107823
LACB1DRAPF\_335170\_Lbic\_170117835
LACB1DRAPF\_316718\_Lbic\_170117691
consensus/100%
consensus/95%
consensus/90%
consensus/85%
Species Abbreviations: Ccin : Coprinopsis cinerea; Lbic : Laccaria bicolor

Back to Contents

**2h. Multiple sequence alignment of Cys cluster that is often fused to the hydroxylase domain**

```

Predicted sec str      --HHHHHHHHHHHHHHH-----HHHHHHHHHH-----HHHHHHH--
CCIG_10424_Ccin_169866911  IQIEARMDFW-----ATWV--GNIEEFKREKVNCGSPLCSV-K--CA-PLETHMCSACFYDPSRYPSNCLRLDYLRLDRLRS---QAGLSPGQVERFMPAY
CCIG_12620_Ccin_169865996  LQIEVRMDFW-----SSWL--EQNADFRGRHVNCVSGPHCTQ-G--CT-PLDDFMACEACFSNGQQYPTNCLRLTQFLRDLTLRS---RGLTSRQITDFLPVY
CCIG_13092_Ccin_169862010  FOLEADYSRF-----DRWA--LQFDKGHFTPPCGNPQCSN-G--CSGPVDEGMWCLPCWLDHGAGFERCKLVDVYLKQTLCE---BGYLTPETAPAFLEBY
CCIG_10224_Ccin_169857292  FOLQSRMEFW-----NWA--SRVCMNDPFLNCGEACHA-G--CD-ALLDHPSCVBCFQTFRGIINWCMQELIAHFLET---DCETPVEEQPFLQY
CCIG_10671_Ccin_169852274  FOLEGFELN-----EWAQALRDEDDNQKEGCCNPDGCD-TPPCD--PLDDMACGLCALQGEAYDCGFFKQYMAHLOH---DAGMPITSIPGFLEOF
CCIG_04135_Ccin_169860374  FETEADLGLN-----REWA--SLDRTGSIIRDCCNCEEGP-R--GN-PLHDYPACNSCF--NSDFGMDFCFSSHSHYHMLMS---QFYTPVHEIPLVLAEY
CCIG_13157_Ccin_169863840  FOLQRTDLN-----KAYT---AQLDHOQTCQDKPEQA-AGACE-IMEDYISCRACF---NDNEVCTLEYDYIHYLNR---DVGIPWDDLVPFLTRY
CCIG_12621_Ccin_169865998  FSVISDNGLW-----CSWT--EALDQGAIVRCSNTECQL-EG--CT-LLGDVLSCLKCFENDAIIGRCDLPLLLRRPMEF---KDLPEEKVRPFTVWF
CCIG_10672_Ccin_169852276  LEYEGSGLN-----HWT--ASRVLLEEQPTCDDPECVN-GGCD--PLRDMSCIRCFDNDKHKDTCSRRQVLSVILAIN---NPHLSEDLKCFIAHY
CCIG_12914_Ccin_169866419  MEAEOLDAN-----RRLY--POLEESHPVGVCKSDYCHDNHHECI--PSPHTMACOPCI---STGHOCSPREDFIARHVAE---AMPVTAQVAEFPVDEY
CCIG_07247_Ccin_169867880  CHDRDRFEDN--FF-----DNIG-----GPCNHEECIKFPGGCM-LTAEGLGCAPCI---KGRPCPWRKDAYIITVILG---ELEVPGKAFQFPFTKL
CCIG_09678_Ccin_169866372  YMSPLRHLF-LLLLEK--KNWG--EFLLAHRPLSRCDALACKQHGSDCS-VGDRHLGCRTCI---RNNVLCSHVTDCLLSTLL---QDAIPVAQANELISTF
CCIG_09735_Ccin_169868221  CHDRDRFEGW--FF-----DNIG-----GPCNQSQCIRFPGGCM-LTKBGLGCAPCI---KGSFPCWRKDAYI IAVILG---ELDVPYKAFEFPTKL
CCIG_11350_Ccin_169866093  VEALQDQRW-----SWT--SOWYTSQNSDESCT--CNI-PDDCV--PIEDAPGACN---VMYEGGMEELKQVREDKRTGSRCCVGVKINWDL
CCIG_04088_Ccin_169860280  FTQNRLTAA-----KAVA-DSTA--VSRSSYSANKVCDNPSCKAKPDSCH--VAPRGRGCLPCN---LALQPCSFVTDIVQRLGLE---CGLQPDDAIAFLE--
CCIG_01240_Ccin_169852992  SCVRLTDFL-----LNP--KHVK--DIVAANPLGPCSAPOCASKEVLCL--PSDVLGCTNCV---RLGLTCSHVDTCLIVFISA---KANIDTALARKFLDAL
CCIG_09972_Ccin_169869428  VMIPRIVRFY---LDP--TGWK--AFVASNPLYGCTALQCSSSDKVKCV--LSDFGCTTCV---RLGLVCSHLETCLTLALAQ---KMNIDAERARQFLRIV
CCIG_10222_Ccin_169857288  LATIQKLVDR--NL-----KEY-----CTQKCIIESFGACH--LTEBFGGPCI---ARGATCPWRKDAYI IAVIMG---ELDLSYKAFEFPTKL
CCIG_11349_Ccin_169866091  VRGLFNKEW-----NDYA---RDNPNPDRCD--PDCQ-GL-CH-PEVDFGIGCA---TRQVCSFLRDFIERRLPSL--HALPMAVNDQFYQQQ
consensus/I00%          .....C.....p.....s.....p..C..C.....C.....hh.....h...
consensus/95%          .....C.....p.....s.....p..C..C.....C.....hh.....h...
consensus/90%          h.....h.....p.h.....Cs..C.....C.....c..uC..C.....C.....hl..h.....s..h..hh...
Species Abbreviations: Ccin : Coprinopsis cinerea

```

[Back to Contents](#)**2i. Gene neighborhoods of the predicted transposase gene associated with JBP**

Note the neighborhoods are rendered in the svg format and your browser should support svg to view this. Most current versions of web browsers support svg.

However, if that is not so and you see a white screen below without the genes, click [here](#) to see the neighborhood

OR if that too doesn't work, click [here](#) to access a pdf file

**Legend for key genes:**

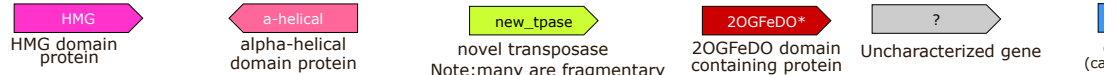

Note: numbers on the left represent Gi numbers of the predicted transposase gene

**Coprinopsis gene neighborhoods** (click on the boxes to access protein sequences)

**Solo 2OGFeDO like genes**

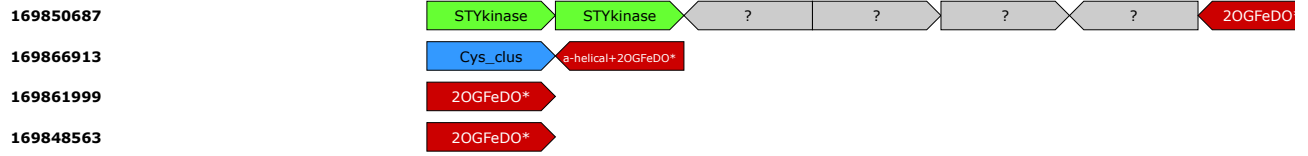

**2OGFeDO like genes in the vicinity of the predicted transposase gene**

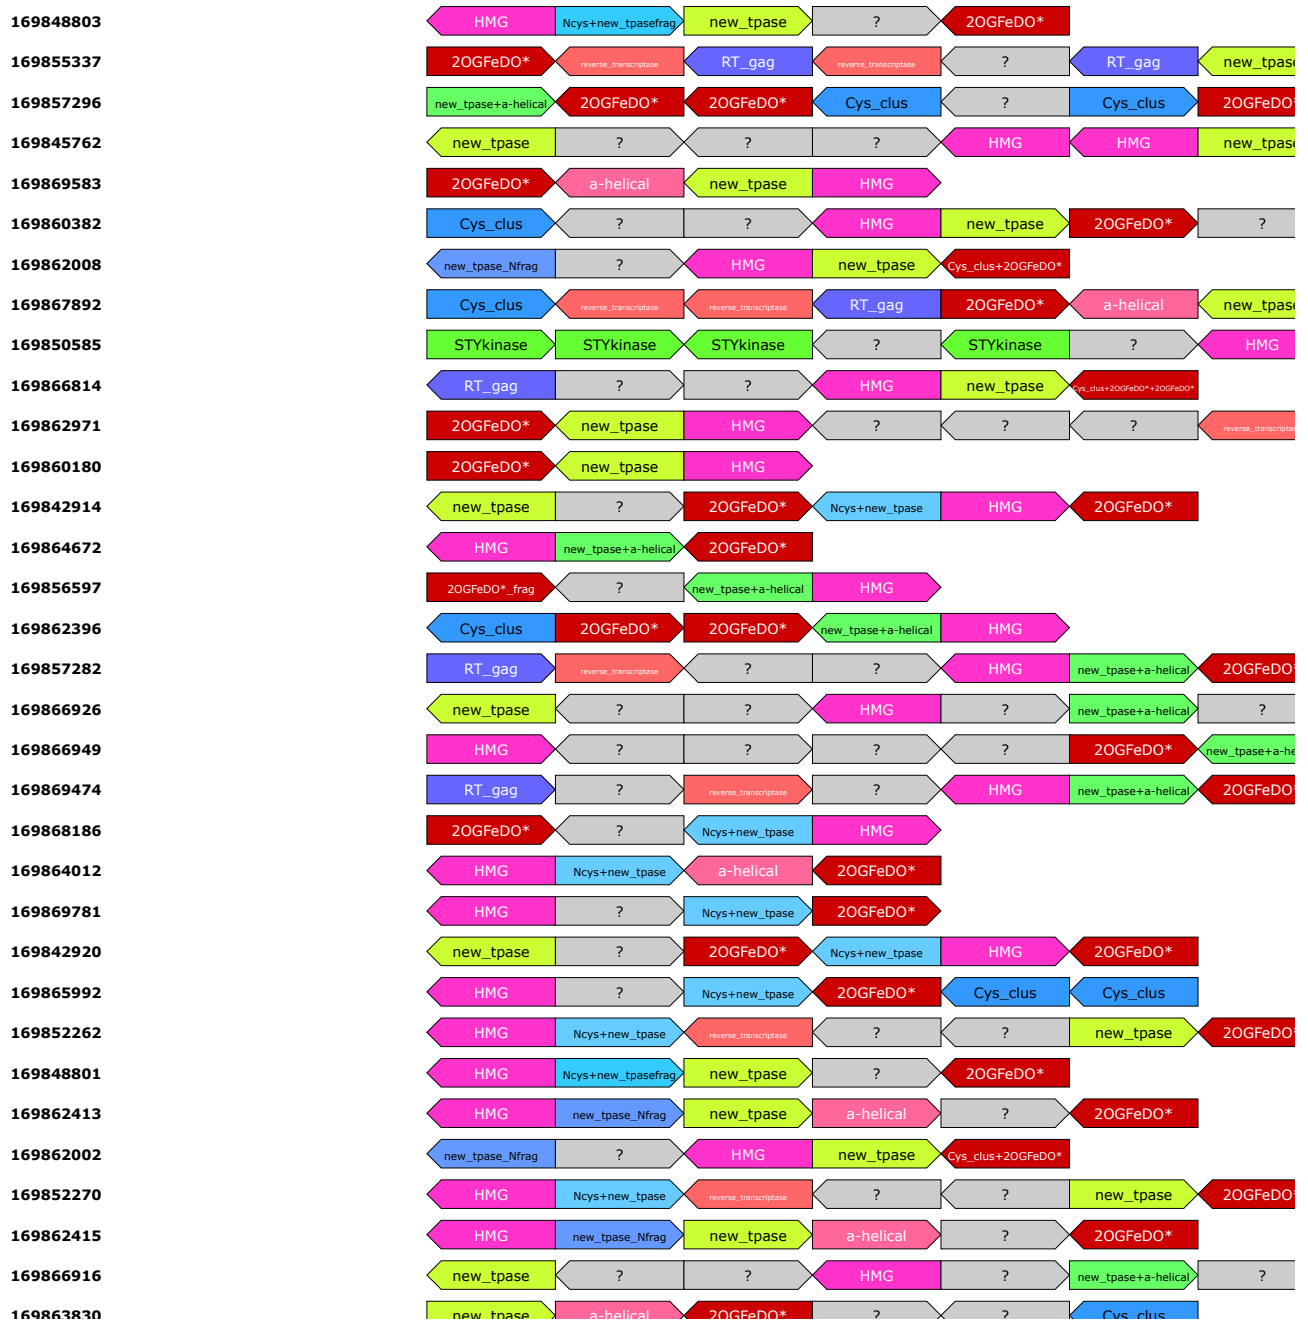



Back to Contents

3. Phyletic distribution, domain architecture and alignment of the algal RNA-modification associated family

Table with columns: GI, Domain architecture, gene name, Len, Organism, class, GenBank Annotat. Includes protein sequences and key features for the 20GFeDo family.

Fasta sequences of proteins not in GenBank and assigned Gags. Includes sequence headers and FASTA format content.

Back to Contents

4. Phyletic distribution, domain architecture and multiple sequence alignment of the fungal subfamily of AlkB proteins that are fused to SAD and R3H domains

Table with columns: Phyetic distribution, gene name, length, Species, class, genbank\_annotat. Includes protein sequences and common domain architecture for the AlkB subfamily.

Back to Contents

5a. Phyletic distribution and multiple sequence alignment of the R3H domain-associated family of 20GFeDo proteins

Table with columns: Phyetic distribution, GI, Domain architecture, gene name, Len, Organism, class, GenBank Annotation. Includes protein sequences for the R3H domain-associated family.

Table with 4 columns: Accession ID, Gene/Protein Name, Species, and Description. Lists various sequences and their associated biological information.

Proteins that lack the 20GPeDo domain

Table listing proteins that lack the 20GPeDo domain, including accession IDs, gene names, and species.

Multiple sequence alignment of the 20GPeDo domain of the R3H domain-associated family

Multiple sequence alignment of the 20GPeDo domain of the R3H domain-associated family, showing conserved residues across various species.

GenBank accession numbers and protein names for various species including Ngru, ChRE, and others. The list includes species like Ngru1000010562, ChREDRAPT\_153458, and many others, each followed by a protein name and a GenBank accession number.

Species abbreviations: Acry : Acidiphillus cryptum; Anig : Aspergillus niger; Avin : Azotobacter vinelandii; Blin : Brevibacterium linens; Ccin : Coprinopsis cinerea; Crel : Chlamy...

Fasta sequences of proteins from incomplete/unpublished genomes not in GenBank and assigned Fake gis

A large block of FASTA-formatted protein sequences. Each entry starts with a header line containing a reference ID and a protein name, followed by one or more lines of amino acid sequence in uppercase letters.



Back to Contents

6a. Phyletic distribution and multiple sequence alignment of the DNA glycosylase associated family of 20GFeD0 domains

Table with columns: gi, Domain architecture, Gene name, Len, Species, Class. Lists various protein entries and their taxonomic classifications.

Predicted secondary structure alignment showing conserved motifs and gaps across different species. Includes motifs like -HHHHH- and -GTMWPLTSSK-.

Species abbreviations: Aano : Aureococcus anophagefferens; Mbre : Monosiga brevicollis; Mxan : Myxococcus xanthus; Oluc : Ostreococcus lucimarinus; Otau : Ostreococcus tauri; Ptri

Fasta sequences of proteins from incomplete/unpublished genomes not in GenBank and assigned Fake gis

FASTA format sequences for various protein entries, starting with >gi [Ehux100018843] ref [jgi] [Emhul] [461717] est:ExtDc\_igenesHEH\_pg\_C\_70042.
